# Supplementary material for: Effect of Aruncus dioicus var. kamtschaticus Extract on Neurodegeneration Improvement: Ameliorating Role in Cognitive Disorder Caused by High-Fat Diet Induced Obesity
Source: MDPI journal article supplement (doi:10.3390/nu11061319), 2019-06-12
Supplement: s1 [file s1]

## Supplementary File

**Table S1.** Effect of ethyl acetate fraction from *Aruncus dioicus* var. *kamtschaticus* (EFAD) on body weight and food intake of HFD-induced obese mice.

|                           | Control                    | HFD                       | EFAD20                    | EFAD40                     |
|---------------------------|----------------------------|---------------------------|---------------------------|----------------------------|
| Initial body weight (g)   | 22.46 ± 1.21 <sup>a</sup>  | 23.00 ± 1.10 <sup>a</sup> | 22.91 ± 1.81 <sup>a</sup> | 23.64 ± 2.45 <sup>a</sup>  |
| Final body weight (g)     | 31.14 ± 1.07 <sup>c</sup>  | 49.38 ± 2.83 <sup>a</sup> | 45.71 ± 2.29 <sup>b</sup> | 45.43 ± 2.51 <sup>b</sup>  |
| Food intake (g/week)      | 26.18 ± 1.74 <sup>a</sup>  | 18.35 ± 0.84 <sup>b</sup> | 18.18 ± 1.64 <sup>b</sup> | 17.73 ± 1.93 <sup>b</sup>  |
| Energy intake (kcal/week) | 100.77 ± 6.71 <sup>a</sup> | 96.15 ± 4.40 <sup>a</sup> | 95.24 ± 8.60 <sup>a</sup> | 92.88 ± 10.11 <sup>a</sup> |

The data were statistically considered at  $p < 0.05$  when comparing with the control group and statistical differences were represented as different small letters.
